# Supplementary material for: Associations between objectively measured physical activity, sedentary behaviour and time in bed among 75+ community-dwelling Danish older adults
Source: Springer Nature journal article supplement (doi:10.1186/s12877-020-01856-6), 2021-01-14
Supplement: MOESM1 [file 18768240]

Sensitivity analysis was conducted to compare the amount of daily sedentary behavior after removing sleep duration with two different methods: by a fixed period (23:00-8:00) and by data from accelerometer diary; and found a 3% inflation in sedentary behavior with the first method due to misclassification of sleep (highlighted in yellow, Table 3).

**Table 3.** Time spent in different intensities of physical activity and sedentary behaviour by removing fixed sleep time or individualized sleep time for each day (n=341)

| Protocol of removing sleep time                                                                                                                                                                                                                                     | Fixed        | Individualized | *P value |
|---------------------------------------------------------------------------------------------------------------------------------------------------------------------------------------------------------------------------------------------------------------------|--------------|----------------|----------|
|                                                                                                                                                                                                                                                                     | Median (IQR) | Median (IQR)   |          |
| Average CPM                                                                                                                                                                                                                                                         | 1877 (755)   | 2054 (864)     | < 0.001  |
| % of time in SB (0-2302)                                                                                                                                                                                                                                            | 67 (14)      | 64 (15)        | < 0.001  |
| % of time in intensity 2303-4999                                                                                                                                                                                                                                    | 21 (8)       | 23 (9)         | < 0.001  |
| % of time in intensity $\geq 5000$                                                                                                                                                                                                                                  | 11 (10)      | 13 (11)        | 0.073    |
| Physical activity and sedentary behaviour were calculated in vector magnitude from 05:00-24:00 (19hr)/day; <b>Fixed sleep time:</b> remove sleep time as 23:05-07:45; <b>Individualized sleep time:</b> by removing sleep time according to sleep log for each day. |              |                |          |
| *Independent sample t-test and Mann-Whitney U test.                                                                                                                                                                                                                 |              |                |          |
